# Supplementary material for: Musashi-2 contributes to myotonic dystrophy muscle dysfunction by promoting excessive autophagy through miR-7 biogenesis repression
Source: PubMed Central journal article supplement — Mol Ther Nucleic Acids. 2021 Aug 19;25:652–67. doi: 10.1016/j.omtn.2021.08.010 (PMC8463325; doi:10.1016/j.omtn.2021.08.010), 2021-08-19
Supplement: mmc1.pdf [file mmc1.pdf]

OMTN, Volume 25

## Supplemental information

**Musashi-2 contributes to myotonic dystrophy  
muscle dysfunction by promoting excessive  
autophagy through *miR-7* biogenesis repression**

**Maria Sabater-Arcis, Ariadna Bargiela, Nerea Moreno, Javier Poyatos-Garcia, Juan J. Vilchez, and Ruben Artero**

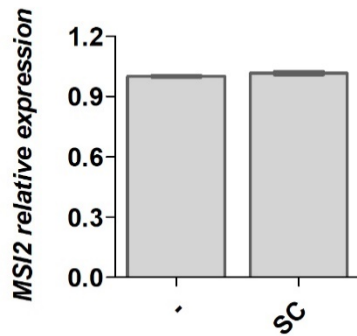

**Figure S1. The scrambled (SC) control ASO does not affect *MSI2* levels.** Quantification by qRT-PCR of the *MSI2* relative expression levels in healthy TDMs differentiated for 7 days treated with 150 nM of SC. The bar graph shows the mean  $\pm$  s.e.m. The mean of *GAPDH* and *GPI* expression was used as a reference for normalization (n = 3).

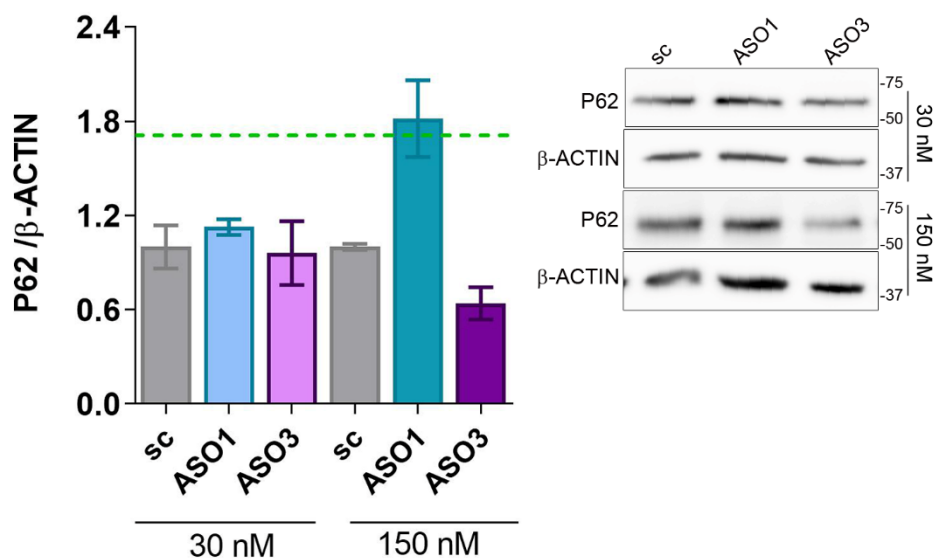

**Figure S2. P62 levels of DM1 TDMs remain unchanged upon treatment with *MSI2*-targeting ASOs.** Quantification and representative western blots of the P62 levels in protein extracts from TDMs treated with the indicated ASOs against the *MSI2* transcripts.  $\beta$ -ACTIN expression was used as an endogenous control (n=3). Green dashed line indicates relative levels of P62 detected in control myotubes. Statistical analyses compared experimentally treated-TDMs with the scrambled gapper at the same concentration and found no significant differences by Student's t-tests. The bar graphs show the mean  $\pm$  s.e.m.

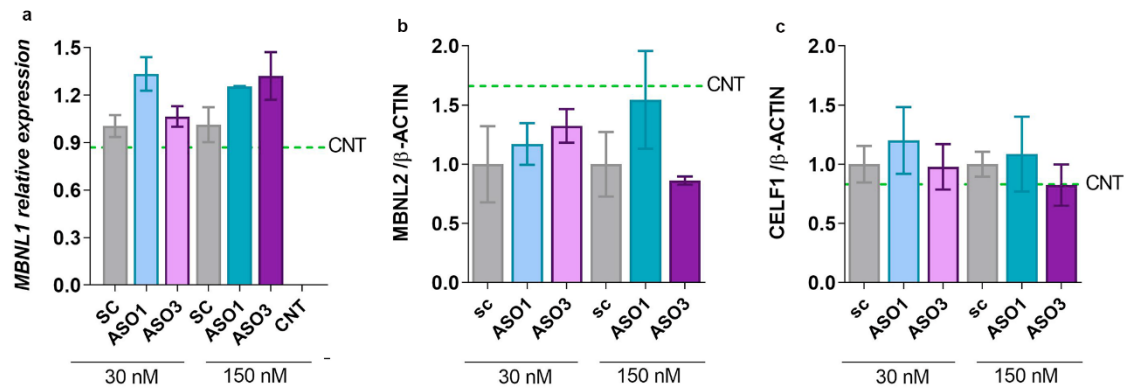

**Figure S3. MBNL1 transcripts, MBNL2 and CELF1 protein levels do not significantly change upon treatment with *MS12* targeting ASOs.** (a) MBNL1 transcripts quantification by RT-qPCR in DM1 myotubes transdifferentiated for 7 days and treated with the indicated molecules targeting *MS12* mRNA. *GAPDH* expression levels were used as endogenous controls (n=3). Western blot quantification of MBNL2 (b) and CELF1 (c) protein expression levels in 7-days transdifferentiated DM1 TDMs after treatment with the indicated ASOs.  $\beta$ -ACTIN expression was used as an endogenous control (n = 3). None of the statistical comparisons of experimental to scrambled-treated TDMs reached the significance threshold. Green dashed lines indicate values detected in control myotubes. The bar graphs show the mean  $\pm$  s.e.m.

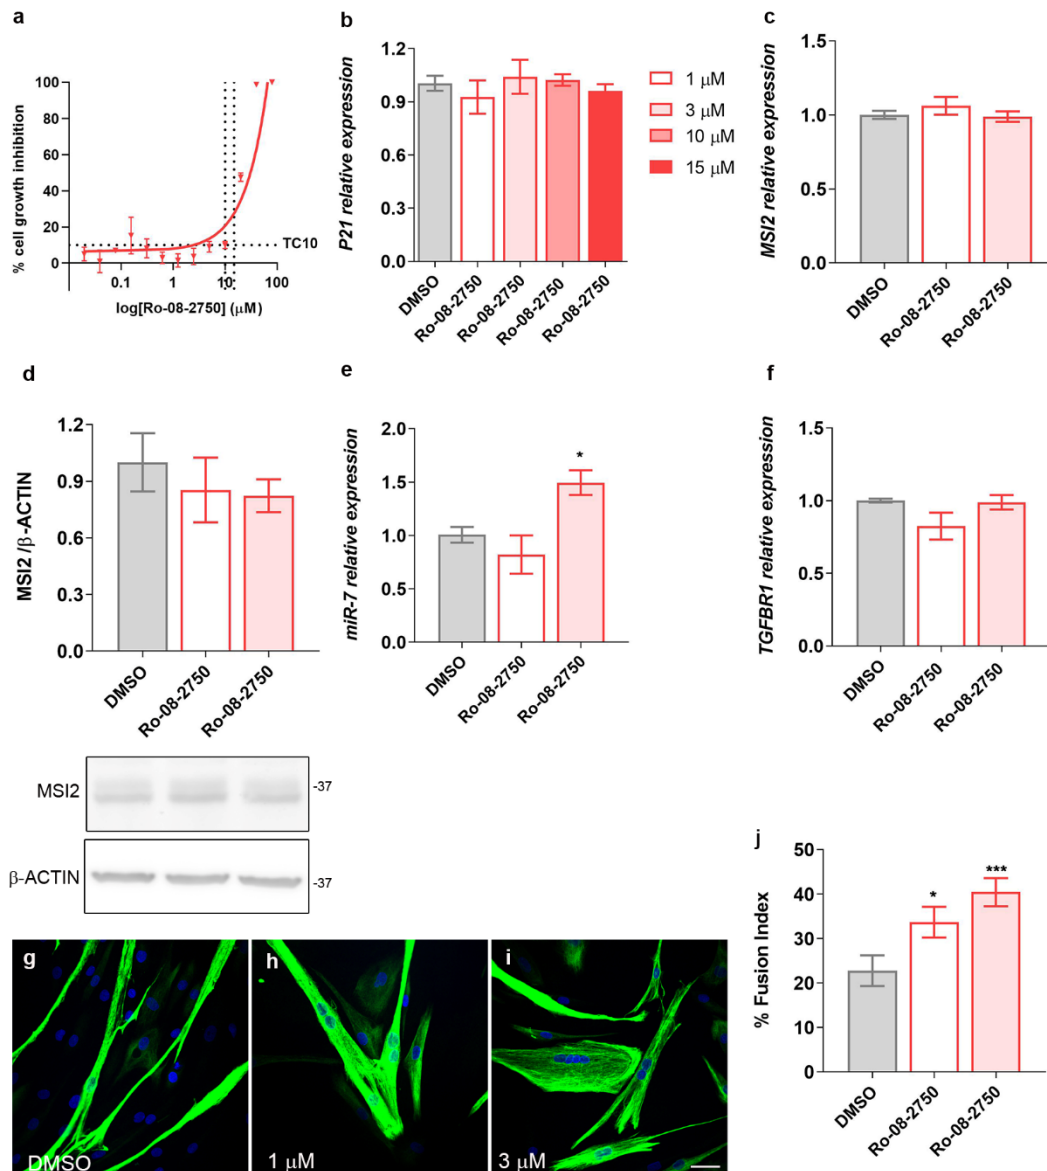

**Figure S4. Effect of Ro-08-2750 treatment in DM1 myotubes.** (a) Cell growth inhibition assay by the MTS method. Human normal TDMs were transfected with a range of Ro 08-2750 concentrations (n=4). TC10 was obtained using the least-squares non-linear regression model. Quantification of mRNA relative expression by qRT-PCR of (b) *P21*, (c) *MSI2*, (e) *miR-7*, and (f) *TGFB1* in DM1 TDMs treated with the vehicle (DMSO), or the indicated concentration of Ro-08-2750. *GAPDH*, *GPI*, and *HPRT1* or *U1* and *U6* expression levels were used as endogenous controls in b,c,f and e, respectively (n=3). (d) *MSI2* relative protein level was quantified by western blot relative to  $\beta$ -ACTIN in myotubes treated with vehicle or with the indicated concentrations of the compound (n=3). Representative blots from each condition are also shown. (j) Quantification of the percentage of myogenic fusion index of DM1 TDMs with the indicated concentrations of the

compound (n=10-15 images). Representative confocal images of Desmin-immunostained (green) human DM1 myotubes transdifferentiated for 7 days after treatment with (g) DMSO as control or with 1 or 3  $\mu\text{M}$  Ro 08-2750 (h,i). Scale bar 40  $\mu\text{m}$ . Nuclei were counterstained with DAPI. The bar graphs show mean  $\pm$  s.e.m. \* $P < 0.05$ , according to Student's t-test.

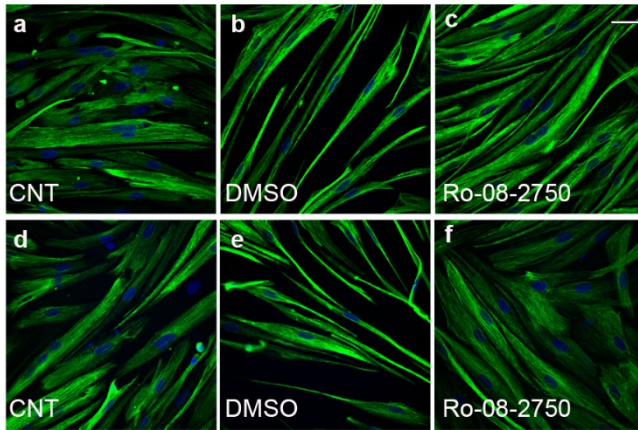

**Figure S5 MSI2 inhibition by Ro 08-2750 improves fusion capacity of 10 and 14 days-differentiated DM1 myoblasts.** Representative confocal images of Desmin-immunostained (green) immortalized myoblasts from control (a,d), DM1 treated with 0.8% DMSO (b,e) or DM1 treated with 10  $\mu\text{M}$  Ro 08-2750 (c,f) differentiated for 10 (a-c) or 14 (d-f) days. Scale bar 40  $\mu\text{m}$ . Nuclei were counterstained with DAPI.

**Table S1 Information of biopsies from skeletal muscle**

|                 | Sample    | Sex    | Age | Muscle               | Repeats length |
|-----------------|-----------|--------|-----|----------------------|----------------|
| <b>Controls</b> | CNT-1     | Female | 61  | Deltoid              | nd             |
|                 | CNT-2     | Male   | 34  | Deltoid              | nd             |
|                 | CNT-3     | Female | 35  | Deltoid              | nd             |
|                 | CNT-4     | Male   | 37  | Biceps               | nd             |
|                 | CNT-5     | Male   | 24  | Deltoid              | nd             |
|                 | CNT-6     | Male   | 25  | Deltoid              | nd             |
|                 | CNT-7     | Female | 29  | Deltoid              | nd             |
|                 | CNT-8     | Female | 46  | Deltoid              | nd             |
|                 | CNT-9     | Male   | 29  | Deltoid              | nd             |
|                 | CNT-10(*) | Male   | 18  | Medial gastrocnemius | nd             |
|                 | CNT-11    | Male   | 50  | Deltoid              | nd             |
|                 | CNT-12    | Male   | 63  | Deltoid              | nd             |
|                 | CNT-13    | Male   | 59  | Deltoid              | nd             |
|                 | CNT-14    | Male   | 47  | Deltoid              | nd             |
|                 | CNT-15    | Female | 34  | Deltoid              | nd             |
|                 | CNT-16    | Male   | 55  | Deltoid              | nd             |

|                 |           |        |    |         |         |
|-----------------|-----------|--------|----|---------|---------|
|                 | CNT-17    | Female | 37 | Deltoid | nd      |
| <b>Patients</b> | DM1-1     | Male   | 30 | Deltoid | nd      |
|                 | DM1-2     | Male   | 61 | Deltoid | 0.3 kb  |
|                 | DM1-3     | Male   | 45 | Deltoid | 3.6 kb  |
|                 | DM1-4     | Female | 69 | Deltoid | 1.1 kb  |
|                 | DM1-5     | Male   | 28 | Deltoid | nd      |
|                 | DM1-6     | Female | 65 | Deltoid | nd      |
|                 | DM1-7     | Female | 33 | Deltoid | 0.9 kb  |
|                 | DM1-8     | Male   | 32 | Deltoid | 0.4 kb  |
|                 | DM1-9     | Female | 68 | Deltoid | 0.2 kb  |
|                 | DM1-10    | Male   | 27 | Deltoid | 0.75 kb |
|                 | DM1-11    | Female | 44 | Deltoid | nd      |
|                 | DM1-12    | Male   | 52 | Deltoid | nd      |
|                 | DM1-13    | Male   | 36 | Deltoid | 3 kb    |
|                 | DM1-14(*) | Female | 50 | Deltoid | 150     |
|                 | DM1-15    | Female | 47 | Deltoid | nd      |
|                 | DM1-16(*) | Male   | 54 | Deltoid | 0.8 kb  |

nd: not determined (\*) biopsies used to isolate primary cells

**Table S2 Sequences of oligonucleotides used for qRT-PCR and semiquantitative RT-PCR**

| <b>Primers sequence</b> | <b>Sequence (5' → 3')</b> | <b>qRT-PCR/RT-PCR</b> | <b>Species</b>      |
|-------------------------|---------------------------|-----------------------|---------------------|
| <i>GAPDH fwd</i>        | CATCTTCCAGGAGCGAGATC      | qRT-PCR/ RT-PCR       | <i>Homo sapiens</i> |
| <i>GAPDH rev</i>        | GTTACACCCATGACGAACAT      | qRT-PCR               | <i>Homo sapiens</i> |
| <i>GPI fwd</i>          | CAGGGCATCATCTGGGACAT      | qRT-PCR               | <i>Homo sapiens</i> |
| <i>GPI rev</i>          | TCTTAGCCAGCTGCTTTCCC      | qRT-PCR               | <i>Homo sapiens</i> |
| <i>HPRT1 fwd</i>        | TGACACTGGCAAACAATGCA      | qRT-PCR               | <i>Homo sapiens</i> |
| <i>HPRT1 rev</i>        | GGTCCTTTTCACCAGCAAGCT     | qRT-PCR               | <i>Homo sapiens</i> |
| <i>IGF1 fwd</i>         | CTCTTCAGTTCGTGTGTGGAGAC   | qRT-PCR               | <i>Homo sapiens</i> |
| <i>IGF1 rev</i>         | CAGCCTCCTTAGATCACAGCTC    | qRT-PCR               | <i>Homo sapiens</i> |
| <i>MSI2 fwd</i>         | GCAGACCTCACCAGATAGCCTT    | qRT-PCR               | <i>Homo sapiens</i> |
| <i>MSI2 rev</i>         | AAGCCTCTGGAGCGTTTTCGTAG   | qRT-PCR               | <i>Homo sapiens</i> |
| <i>MSTN fwd</i>         | TGAGAATGGTCATGATCTTGCTGT  | qRT-PCR               | <i>Homo sapiens</i> |
| <i>MSTN rev</i>         | TCATCACAGTCAAGACCAAAATCC  | qRT-PCR               | <i>Homo sapiens</i> |
| <i>mTOR fwd</i>         | AGCATCGGATGCTTAGGAGTGG    | qRT-PCR               | <i>Homo sapiens</i> |
| <i>mTOR rev</i>         | CAGCCAGTCATCTTTGGAGACC    | qRT-PCR               | <i>Homo sapiens</i> |

|                   |                          |         |                     |
|-------------------|--------------------------|---------|---------------------|
| <i>NFIX fwd</i>   | GAGCCCTGTTGATGACGTGTTCTA | RT-PCR  | <i>Homo sapiens</i> |
| <i>NFIX rev</i>   | CTGCACAAACTCCTTCAGTGAGTC | RT-PCR  | <i>Homo sapiens</i> |
| <i>P21 fwd</i>    | AGGTGGACCTGGAGACTCTCAG   | qRT-PCR | <i>Homo sapiens</i> |
| <i>P21 rev</i>    | TCCTCTTGGAGAAGATCAGCCG   | qRT-PCR | <i>Homo sapiens</i> |
| <i>PKM fwd</i>    | CTGAAGGCAGTGATGTGCGCC    | RT-PCR  | <i>Homo sapiens</i> |
| <i>PKM rev</i>    | ACCCGGAGGTCCACGTCTC      | RT-PCR  | <i>Homo sapiens</i> |
| <i>SERCA1 fwd</i> | GATGATCTTCAAGCTCCGGGC    | RT-PCR  | <i>Homo sapiens</i> |
| <i>SERCA1 rev</i> | CAGCTCTGCCTGAAGATGTG     | RT-PCR  | <i>Homo sapiens</i> |
| <i>TGFBR1 fwd</i> | GACAACGTCAGGTTCTGGCTCA   | qRT-PCR | <i>Homo sapiens</i> |
| <i>TGFBR1 rev</i> | CCGCCACTTTCCTCTCCAAACT   | qRT-PCR | <i>Homo sapiens</i> |
